# Supplementary material for: NtLTP4, a lipid transfer protein that enhances salt and drought stresses tolerance in Nicotiana tabacum
Source: PubMed Central journal article supplement (PMC5995848; doi:10.1038/s41598-018-27274-8), 2018-06-11
Supplement: 41598_2018_27274_MOESM1_ESM.pdf [file 41598_2018_27274_MOESM1_ESM.pdf]

Published in *Scientific Reports*.

Title:  
NtLTP4, a lipid transfer protein that enhances salt and drought stresses tolerance in *Nicotiana tabacum*

Yang Xu<sup>1\*</sup>, Xinxin Zheng<sup>1\*</sup>, Yunzhi Song<sup>1</sup>, Lifei Zhu<sup>1</sup>, Zipeng Yu<sup>1</sup>, Liming Gan<sup>1</sup>, Shumei Zhou<sup>2</sup>, Hongmei Liu<sup>1</sup>, Fujiang Wen<sup>1</sup>, Changxiang Zhu<sup>1#</sup>

Affiliations:

<sup>1</sup>State Key Laboratory of Crop Biology, College of Life Sciences, Shandong Agricultural University, Tai'an, Shandong, P.R China

<sup>2</sup>State Key Laboratory of Crop Biology, College of Agronomy, Shandong Agricultural University, Tai'an, Shandong, P.R China

\*Co-first Author: Yang Xu, Xinxin Zheng

\*The authors contributed equally to this work.

#Corresponding author:

Changxiang Zhu

State Key Laboratory of Crop Biology, College of Life Sciences, Shandong Agricultural University, Tai'an, Shandong, P.R China

E-mail: zhchx@sdau.edu.cn

**Fig. S1**

**a**

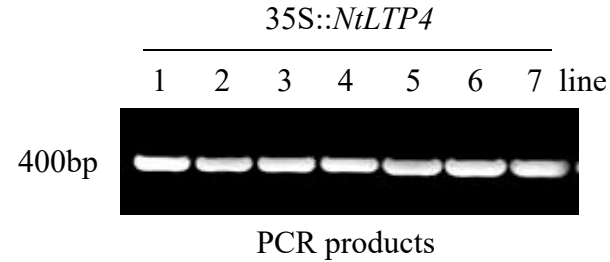

**b**

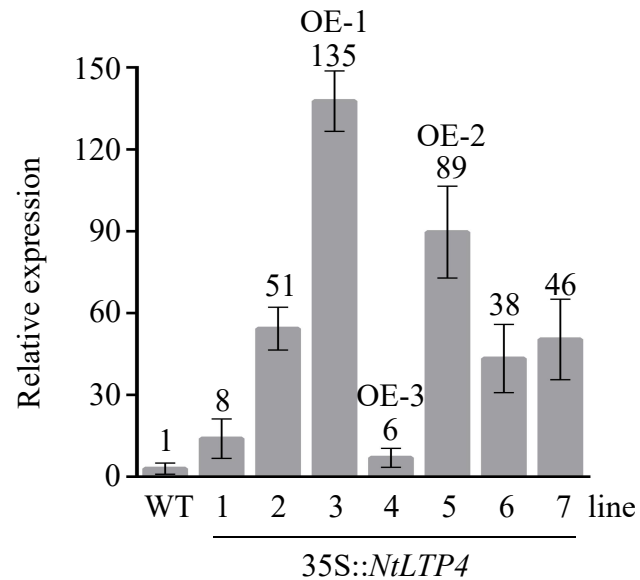

**Supplementary Figure S1. The expression levels of *NtLTP4* in overexpressing lines.** (a) PCR identification of the transgenic tobacco plants. (b) RNA extracted from leaves of 14-day-old *N. tabacum* and qPCR analysis of *NtLTP4* expression levels in different overexpressing lines.

**Fig. S2**

**a**

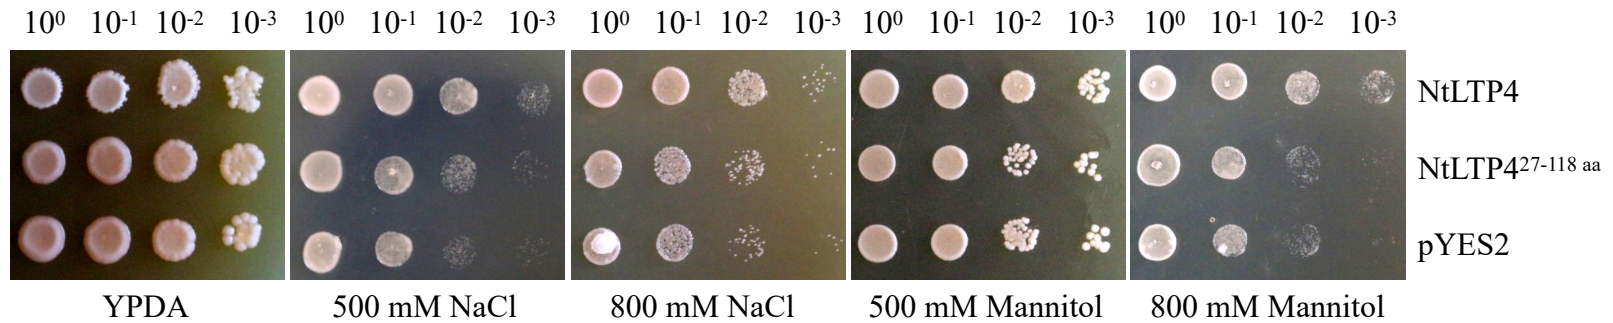

**b**

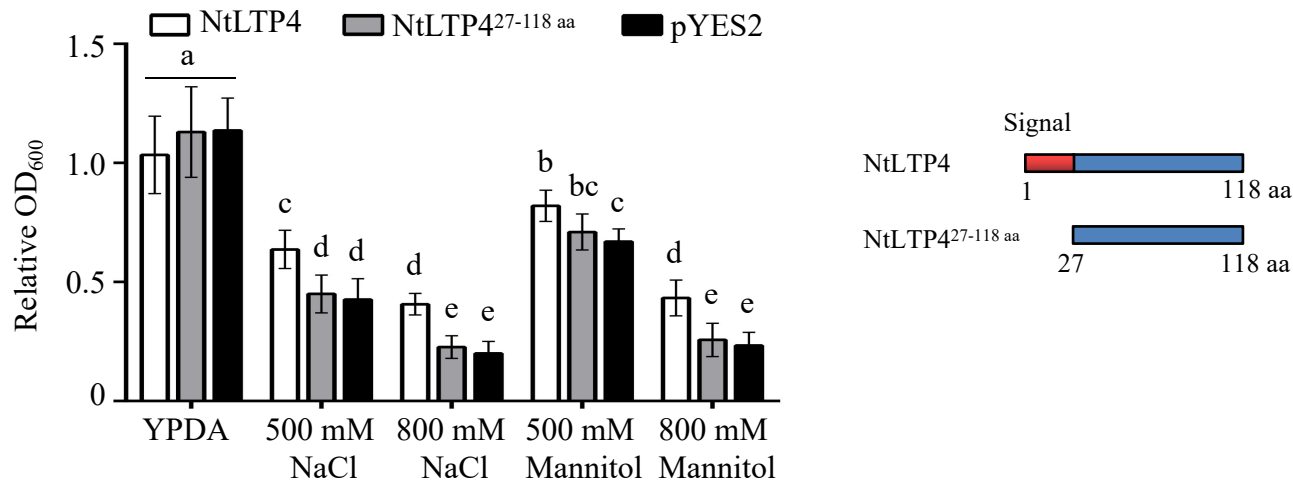

**Supplementary Figure S2. Overexpression of *NtLTP4* in transgenic yeast enhanced salt and drought tolerance.**

(a) Yeast transformants containing pYES2 empty vector, NtLTP4<sup>27-118 aa</sup>, or NtLTP4 cultured on YPDA solid medium with or without various concentrations of NaCl and Mannitol. (b) Absorbance of stock cultures at OD<sub>600</sub> in YPDA liquid medium with or without various concentrations of NaCl and mannitol, which obtained and reported as value corresponding to different stock cultures in YPDA liquid medium. The structures of plasmids used for this experiment demonstrated in the right. The red cuboids indicate the signal peptide of NtLTP4; the blue cuboids indicate the likely functional domain. Experiment was repeated three times. Error bars indicate SEM. One-way ANOVA (Duncan's multiple range test) was performed, and statistical significant differences are indicated by different lowercase letters ( $P < 0.01$ ).

**Fig. S3**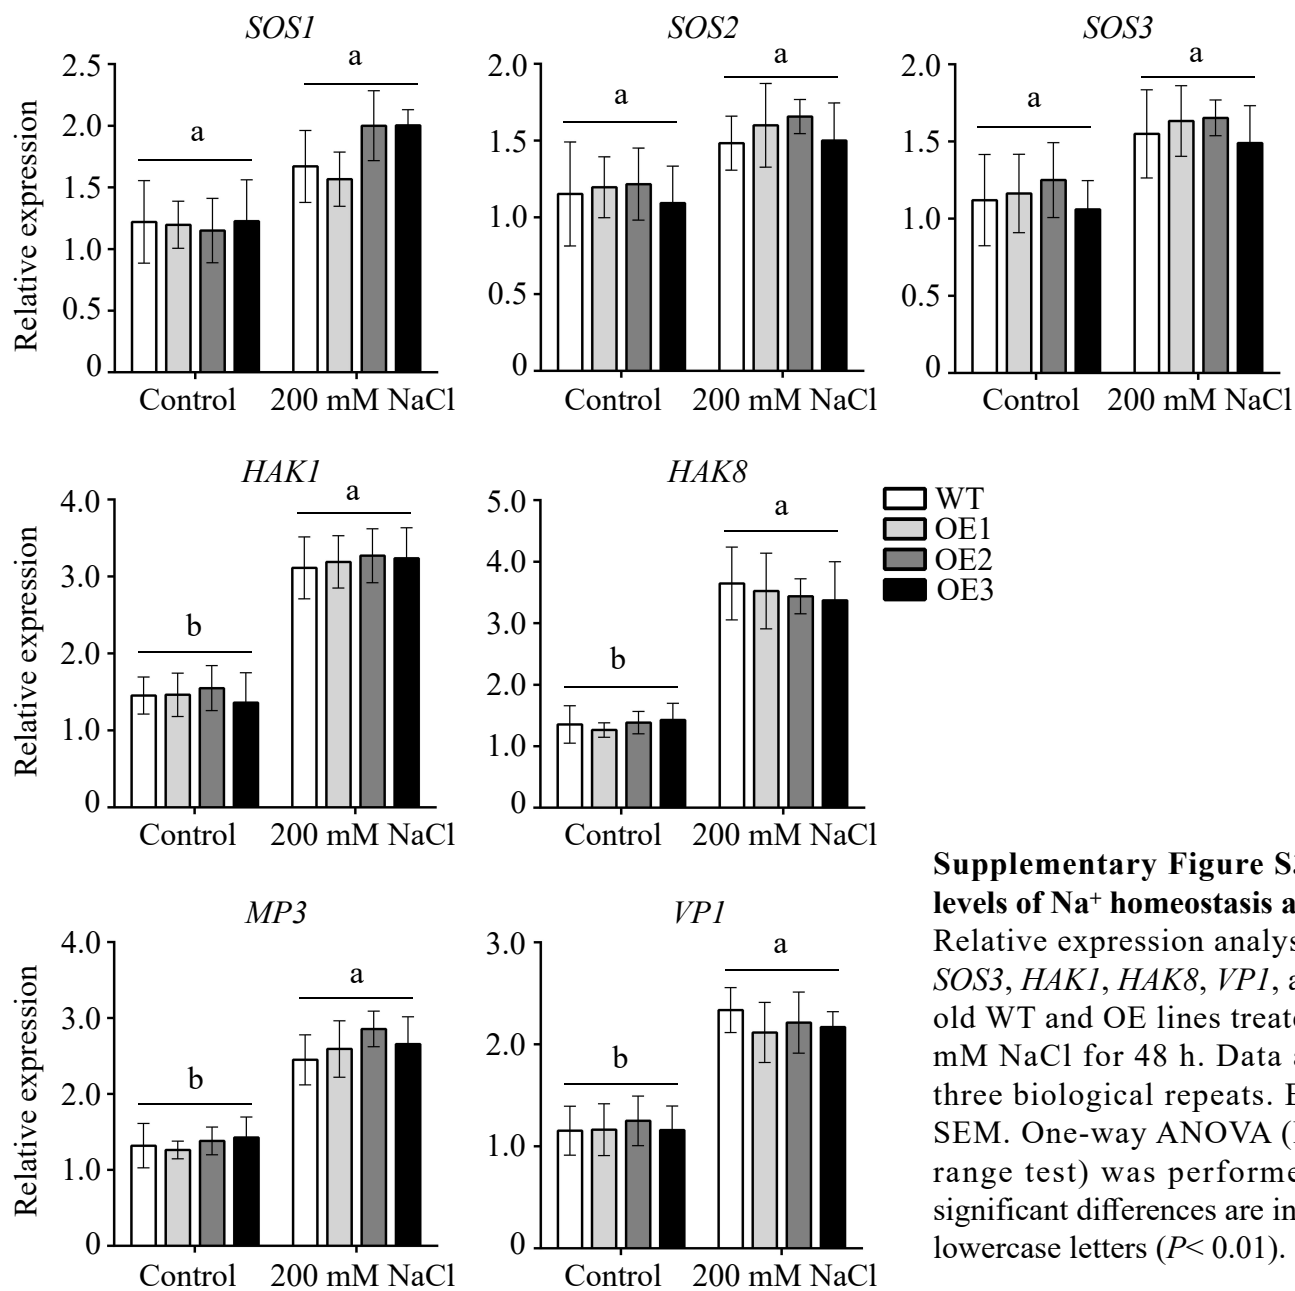**Supplementary Figure S3. The expression levels of Na<sup>+</sup> homeostasis associated genes.**

Relative expression analysis of *SOS1*, *SOS2*, *SOS3*, *HAK1*, *HAK8*, *VPI*, and *MP3* in 14-day-old WT and OE lines treated with MS or 200 mM NaCl for 48 h. Data as mean values of three biological repeats. Error bars indicate SEM. One-way ANOVA (Duncan's multiple range test) was performed, and statistical significant differences are indicated by different lowercase letters ( $P < 0.01$ ).

**Fig. S4****a**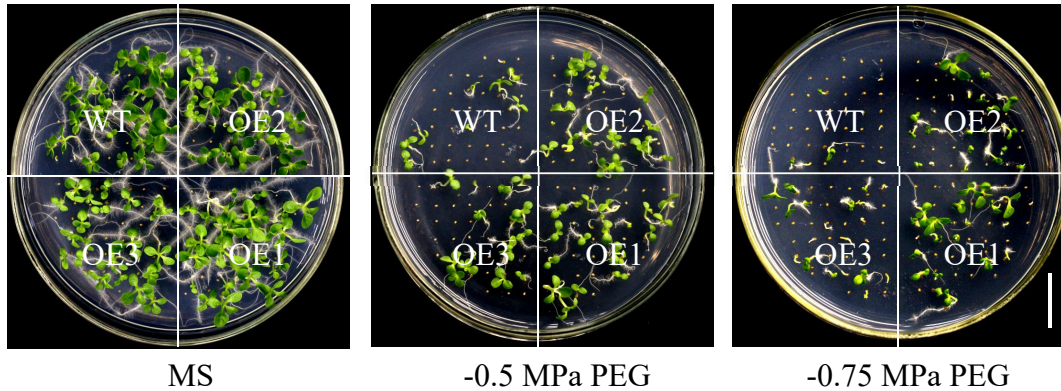**c**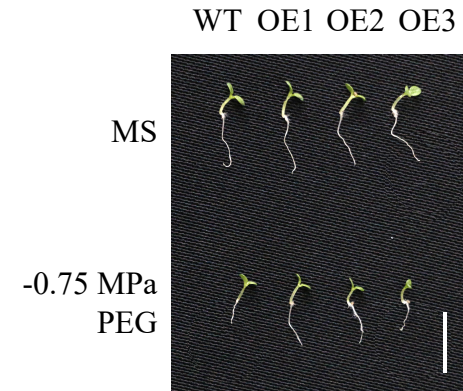**b**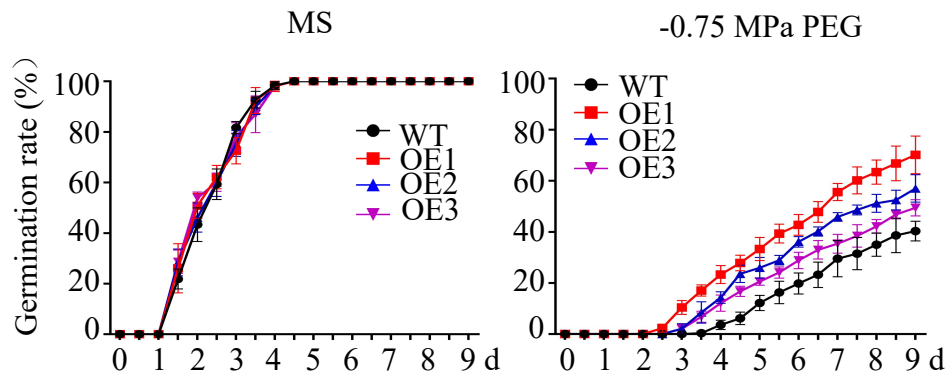**d**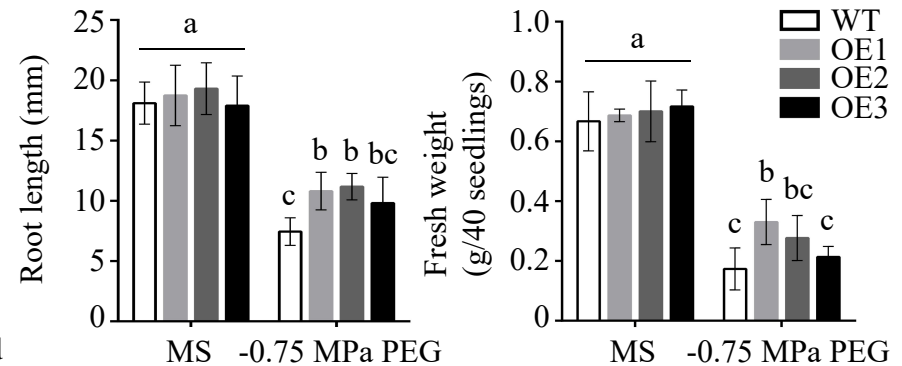**Supplementary Figure S4. Overexpression of *NtLTP4* in transgenic plants enhanced drought tolerance.**

**(a)** Seed germination on MS medium containing various concentrations of PEG. Bar= 1 cm. **(b)** Germination rates of WT and OE lines in MS medium with or without PEG. **(c)** Seedling phenotype of 14-day-old WT and OE lines with or without PEG treatment. Bar= 1 cm. **(d)** Root length and fresh weight of seedlings shown in (c). Data as mean values of three biological repeats. Error bars indicate SEM. One-way ANOVA (Duncan's multiple range test) was performed, and statistical significant differences are indicated by different lowercase letters ( $P < 0.01$ ).

**Fig. S5**

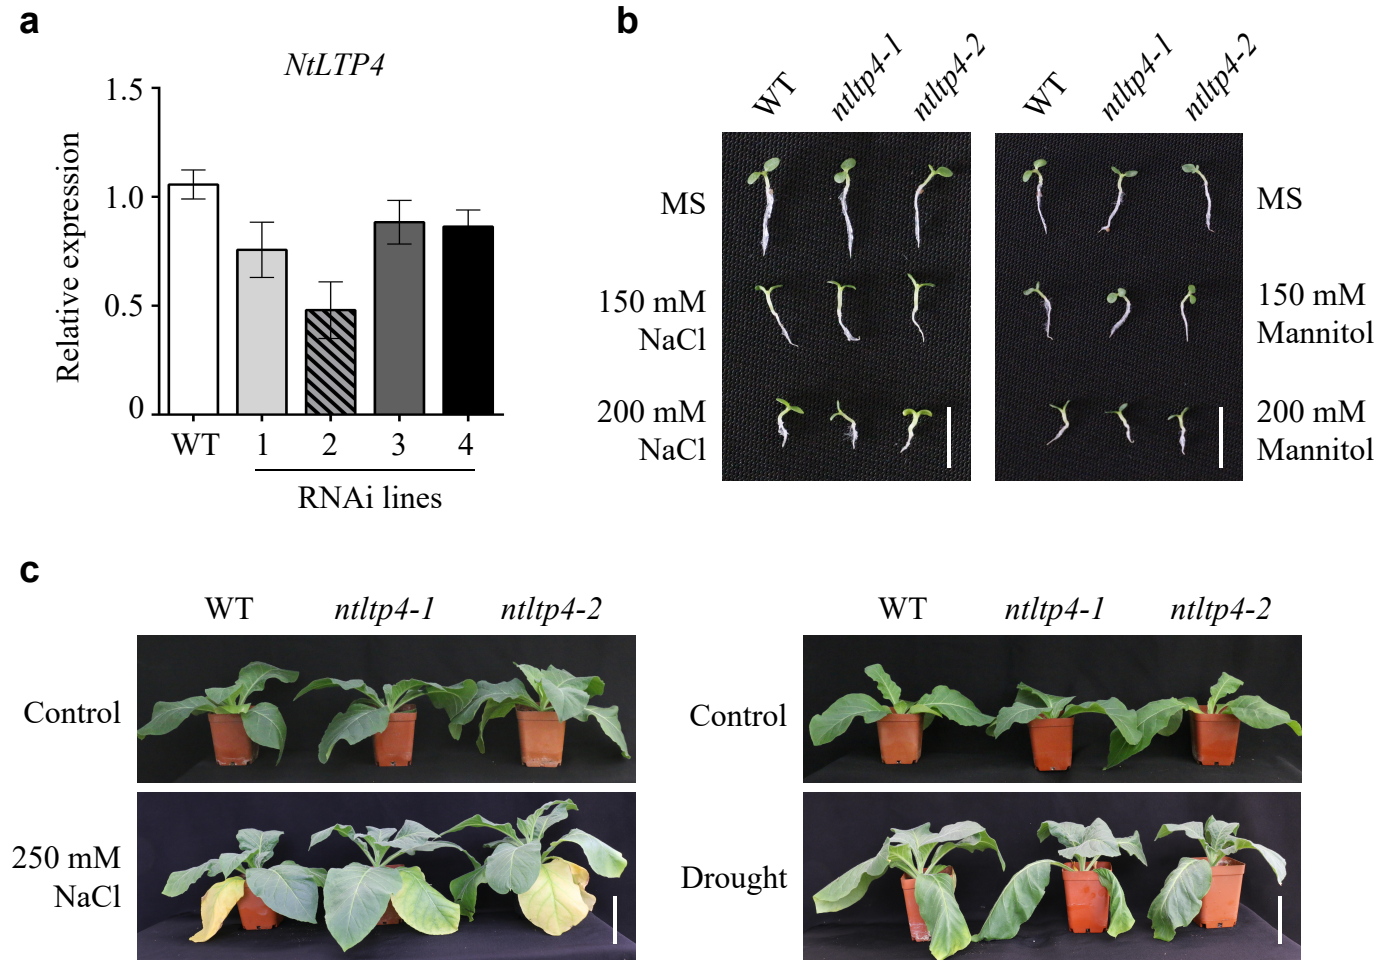

**Supplementary Figure S5. The phenotype of RNAi lines under salt and drought stress.**

**(a)** Relative expression analysis of *NtLTP4* in 14-day-old RNAi lines. **(b)** Seedling phenotype of 14-day-old WT and RNAi lines with or without salt and drought stress treatment. Bars= 1 cm. **(c)** Phenotype of 8-week-old WT and RNAi lines grown in soil irrigated with water and 250 mM NaCl solution for 1 month for salt stress treatment, and with or without dehydration treatment for 15 days for drought stress treatment. Bars= 2 cm.

**Supplementary Table S1. Seven prey proteins screened by yeast-two-hybrid assay.**

| <b>Annotation/locus ID</b> | <b>Description</b>                                                         |
|----------------------------|----------------------------------------------------------------------------|
| LOC107791032               | Nicotiana tabacum suppressor of mec-8 and unc-52 protein homolog 2-like    |
| LOC107814725               | Nicotiana tabacum large proline-rich protein BAG6                          |
| LOC107806366               | Nicotiana tabacum plant intracellular Ras-group-related LRR protein 7-like |
| LOC107793888               | Nicotiana tabacum ankyrin repeat domain-containing protein 2B-like         |
| LOC107799413               | Nicotiana tabacum uncharacterized LOC107799413                             |
| LOC107794718               | Nicotiana tabacum uncharacterized LOC107794718                             |
| LOC107821857               | WIPK, mitogen-activated protein kinase 3-like                              |

**Supplementary Table S2. Primers used in this study.**

| Purpose | Name             | Sequence              |
|---------|------------------|-----------------------|
| qRT-PCR | $\beta$ -Actin-F | TTGGCTTACATTGCTCTTG   |
|         | $\beta$ -Actin-R | TCATTGATGGTTGGAACAG   |
|         | NtGST-F          | GCTTGGGTAAAGGGATTG    |
|         | NtGST-R          | AGACAACACTCTCAGACAGA  |
|         | NtCAT-F          | TTCTCCTACTCTGATACC    |
|         | NtCAT-R          | ATAGTGATTGTTGTGATGA   |
|         | NtAPX-F          | ACTGCTAATCCACTTATCTT  |
|         | NtAPX-R          | GTCTGATGGCAACTGTAA    |
|         | NtSOD-F          | ACCAGAAGCATCATCAGA    |
|         | NtSOD-R          | CTTTGGAAATGGCGTCAT    |
|         | NtRbohA-F        | AAGGTGTTATGAACGAAGTG  |
|         | NtRbohA-R        | CTGGTGCCTGATACGATA    |
|         | NtRbohB-F        | CTATGCTTCAGTCTCTTCAC  |
|         | NtRbohB-R        | GGCGTGTTGTCTTAGTTC    |
|         | NtSOS1-F         | TGGAGGAAGCGACCGATTC   |
|         | NtSOS1-R         | CGATAACGAGAAGAGCGACAG |
|         | NtSOS2-F         | CTGTTGCTCATTGTCACTG   |
|         | NtSOS2-R         | CGTAACCCTGTCCACTAAG   |
|         | NtSOS3-F         | GTCACGCCATTCACGGTAG   |
|         | NtSOS3-R         | CACTCCATTTCGCTTCACATC |
|         | NtNHX1-F         | AAGAAGGTCATACTCAGTT   |
|         | NtNHX1-R         | GGTAGCAATAGTCTAATCAAT |
|         | NtHKT1-F         | GTAATGATGTATCTTCTCCAT |
|         | NtHKT1-R         | TTCTTCCACAGTCTCTTCT   |
|         | NtHAK1-F         | AGATGTATAGCACGATATG   |
|         | NtHAK1-R         | TTGTTCCAATAACTGTCA    |
|         | NtHAK8-F         | AGATGTATAGCACGATATG   |
|         | NtHAK8-R         | TTGTTCCAATAACTGTCA    |
|         | NtMP3-F          | CTACTACACAGGACATCC    |
|         | NtMP3-R          | AGCCATAAGAATACCAGAA   |
|         | NtVP1-F          | ACTGGCACATATTCTTCTG   |
|         | NtVP1-R          | CTGAACTGGACTGTAAGC    |



| Purpose           | Name                                | Sequence                                                 |
|-------------------|-------------------------------------|----------------------------------------------------------|
| Y2H assay         | NtLTP4-AD-F                         | GAATTCATGGCTAAAGTAGCATTGTTGGTGG                          |
|                   | NtLTP4-AD-R                         | GGATCCTTACTGCACCGTGGAGCAGTC                              |
|                   | NtLTP4-BD-F                         | GAATTCATGGCTAAAGTAGCATTGTTGGTGG                          |
|                   | NtLTP4-BD-R                         | GGATCCTTACTGCACCGTGGAGCAGTC                              |
|                   | WIPK-AD-F                           | GAATTCATGGCTAATCAAATCGGCGGAGC                            |
|                   | WIPK-AD-R                           | GGATCCTCATATTTTTAGTTCAACAAAGTCTGGGTAGA                   |
|                   | WIPK-BD-F                           | GAATTCATGGCTAATCAAATCGGCGGAGC                            |
|                   | WIPK-BD-R                           | GGATCCTCATATTTTTAGTTCAACAAAGTCTGGGTAG                    |
| Transgenic yeast  | NtLTP4-pYES2-F                      | GGATCCATGGCTAAAGTAGCATTGTTGGTGGTGTG                      |
|                   | NtLTP4-pYES2-R                      | GAATTCTTACTGCACCGTGGAGCAGTC                              |
|                   | NtLTP4-pYES2 <sup>27-118aa</sup> -F | GGATCCATCTCTTGTGGGCAGGTTGTTGC                            |
|                   | NtLTP4-pYES2 <sup>27-118aa</sup> -R | GAATTCTTACTGCACCGTGGAGCAGTC                              |
| Co-IP             | WIPK-121-HA-F                       | GGATCCATGTACCCATACGACGTCCCAGACTACGCTGCTAATCAAATCGGCGGAGC |
|                   | WIPK-121-HA-R                       | GAGCTCTCATATTTTTAGTTCAACAAAGTCTGGG                       |
|                   | NtLTP4-121-GFP-F                    | GGATCCATGGCTAAAGTAGCATTGTTGGTGG                          |
|                   | NtLTP4-121-GFP-R                    | GTCGACCTGCACCGTGGAGCAGTC                                 |
| Transgenic plants | LTP OE F                            | TCTAGAATGGCTAAAGTAGCATTGTTGG                             |
|                   | LTP OE R                            | GAGCTCTTACTGCACCGTGGAGCAGTC                              |
|                   | LTP-GFP-F                           | GGATCCATGGCTAAAGTAGCATTGTTGGTGGTGG                       |
|                   | LTP-GFP-R                           | GGTACCCTGCACCGTGGAGCAGTC                                 |
|                   | LTP-RNAi-1-F                        | TCTAGATGGCTAAAGTAGCATTGTTGG                              |
|                   | LTP-RNAi-1-R                        | GGATCCTTACTGCACCGTGGAGCAGTC                              |
|                   | LTP-RNAi-2-F                        | GGTACCTGGCTAAAGTAGCATTGTTGG                              |
|                   | LTP-RNAi-2-R                        | GGATCCGCAGATTTAATACAGTTACAAGCCGTCTG                      |
| LCI assay         | LTP-cLUC-F                          | GGTACCATGGCTAAAGTAGCATTGTTGGTGG                          |
|                   | LTP-cLUC-R                          | GTCGACTTACTGCACCGTGGAGCAGTC                              |
|                   | LTP-nLUC-F                          | GGTACCATGGCTAAAGTAGCATTGTTGGTGG                          |
|                   | LTP-nLUC-R                          | GTCGACTTACTGCACCGTGGAGCAGTC                              |
|                   | WIPK-cLUC-F                         | GGTACCATGGCTAATCAAATCGGCGGAGC                            |
|                   | WIPK-cLUC-R                         | GTCGACTCATATTTTTAGTTCAACAAAGTCTGGGTAGA                   |
|                   | WIPK-nLUC-F                         | GGTACCATGGCTAATCAAATCGGCGGAG                             |
|                   | WIPK-nLUC-R                         | GTCGACTATTTTTAGTTCAACAAAGTCTGGGTAGA                      |

The original figures

|            |   |   |   |
|------------|---|---|---|
| GFP        | + | - | - |
| NtLTP4-GFP | - | - | + |
| WIPK-HA    | + | + | + |

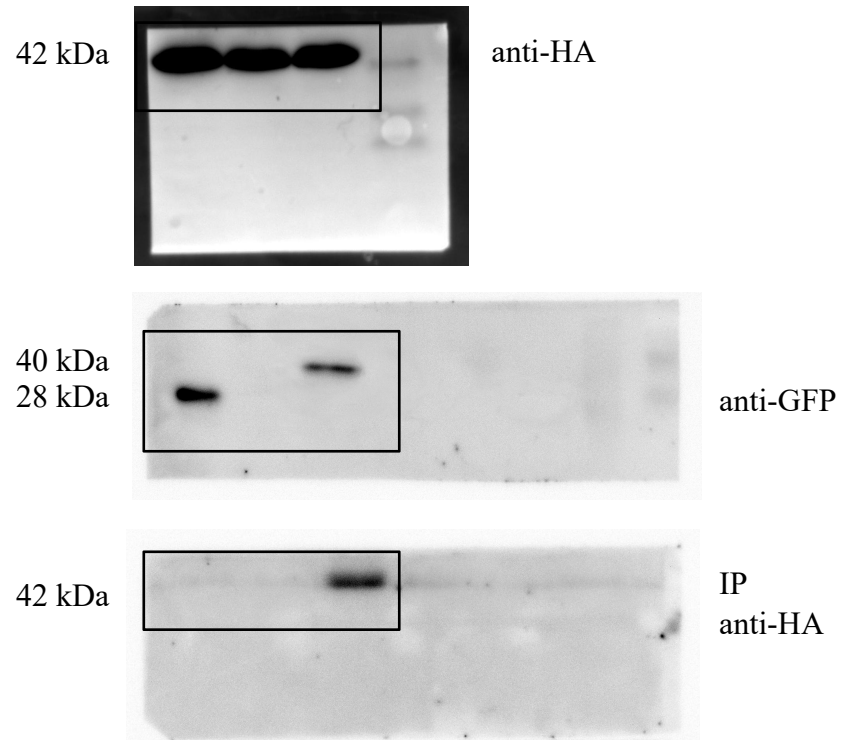

Images showed in Figure 8e are indicated by black boxes.

The original figure

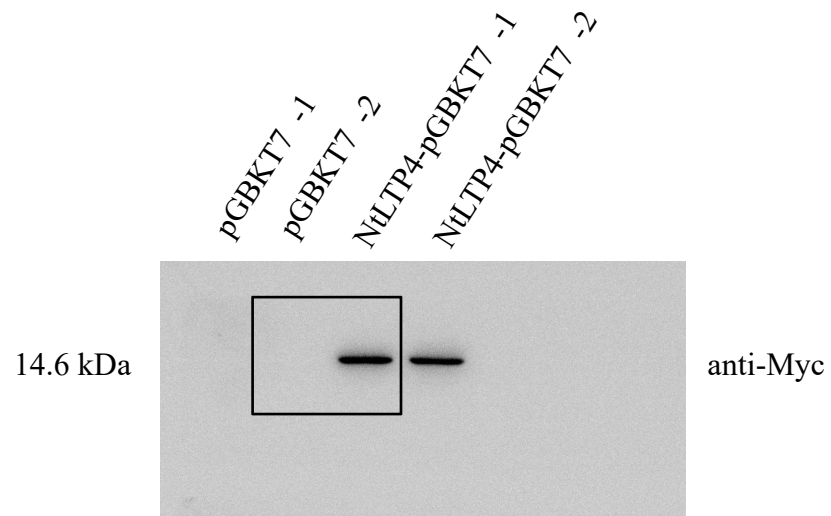

Image showed in Figure 8a is indicated by black box.
